# Supplementary figures and images for: Trends in fragmentation and connectivity of Paspalum quadrifarium grasslands in the Buenos Aires province, Argentina
Source: PeerJ journal article supplement (doi:10.7717/peerj.6450), 2019-02-27

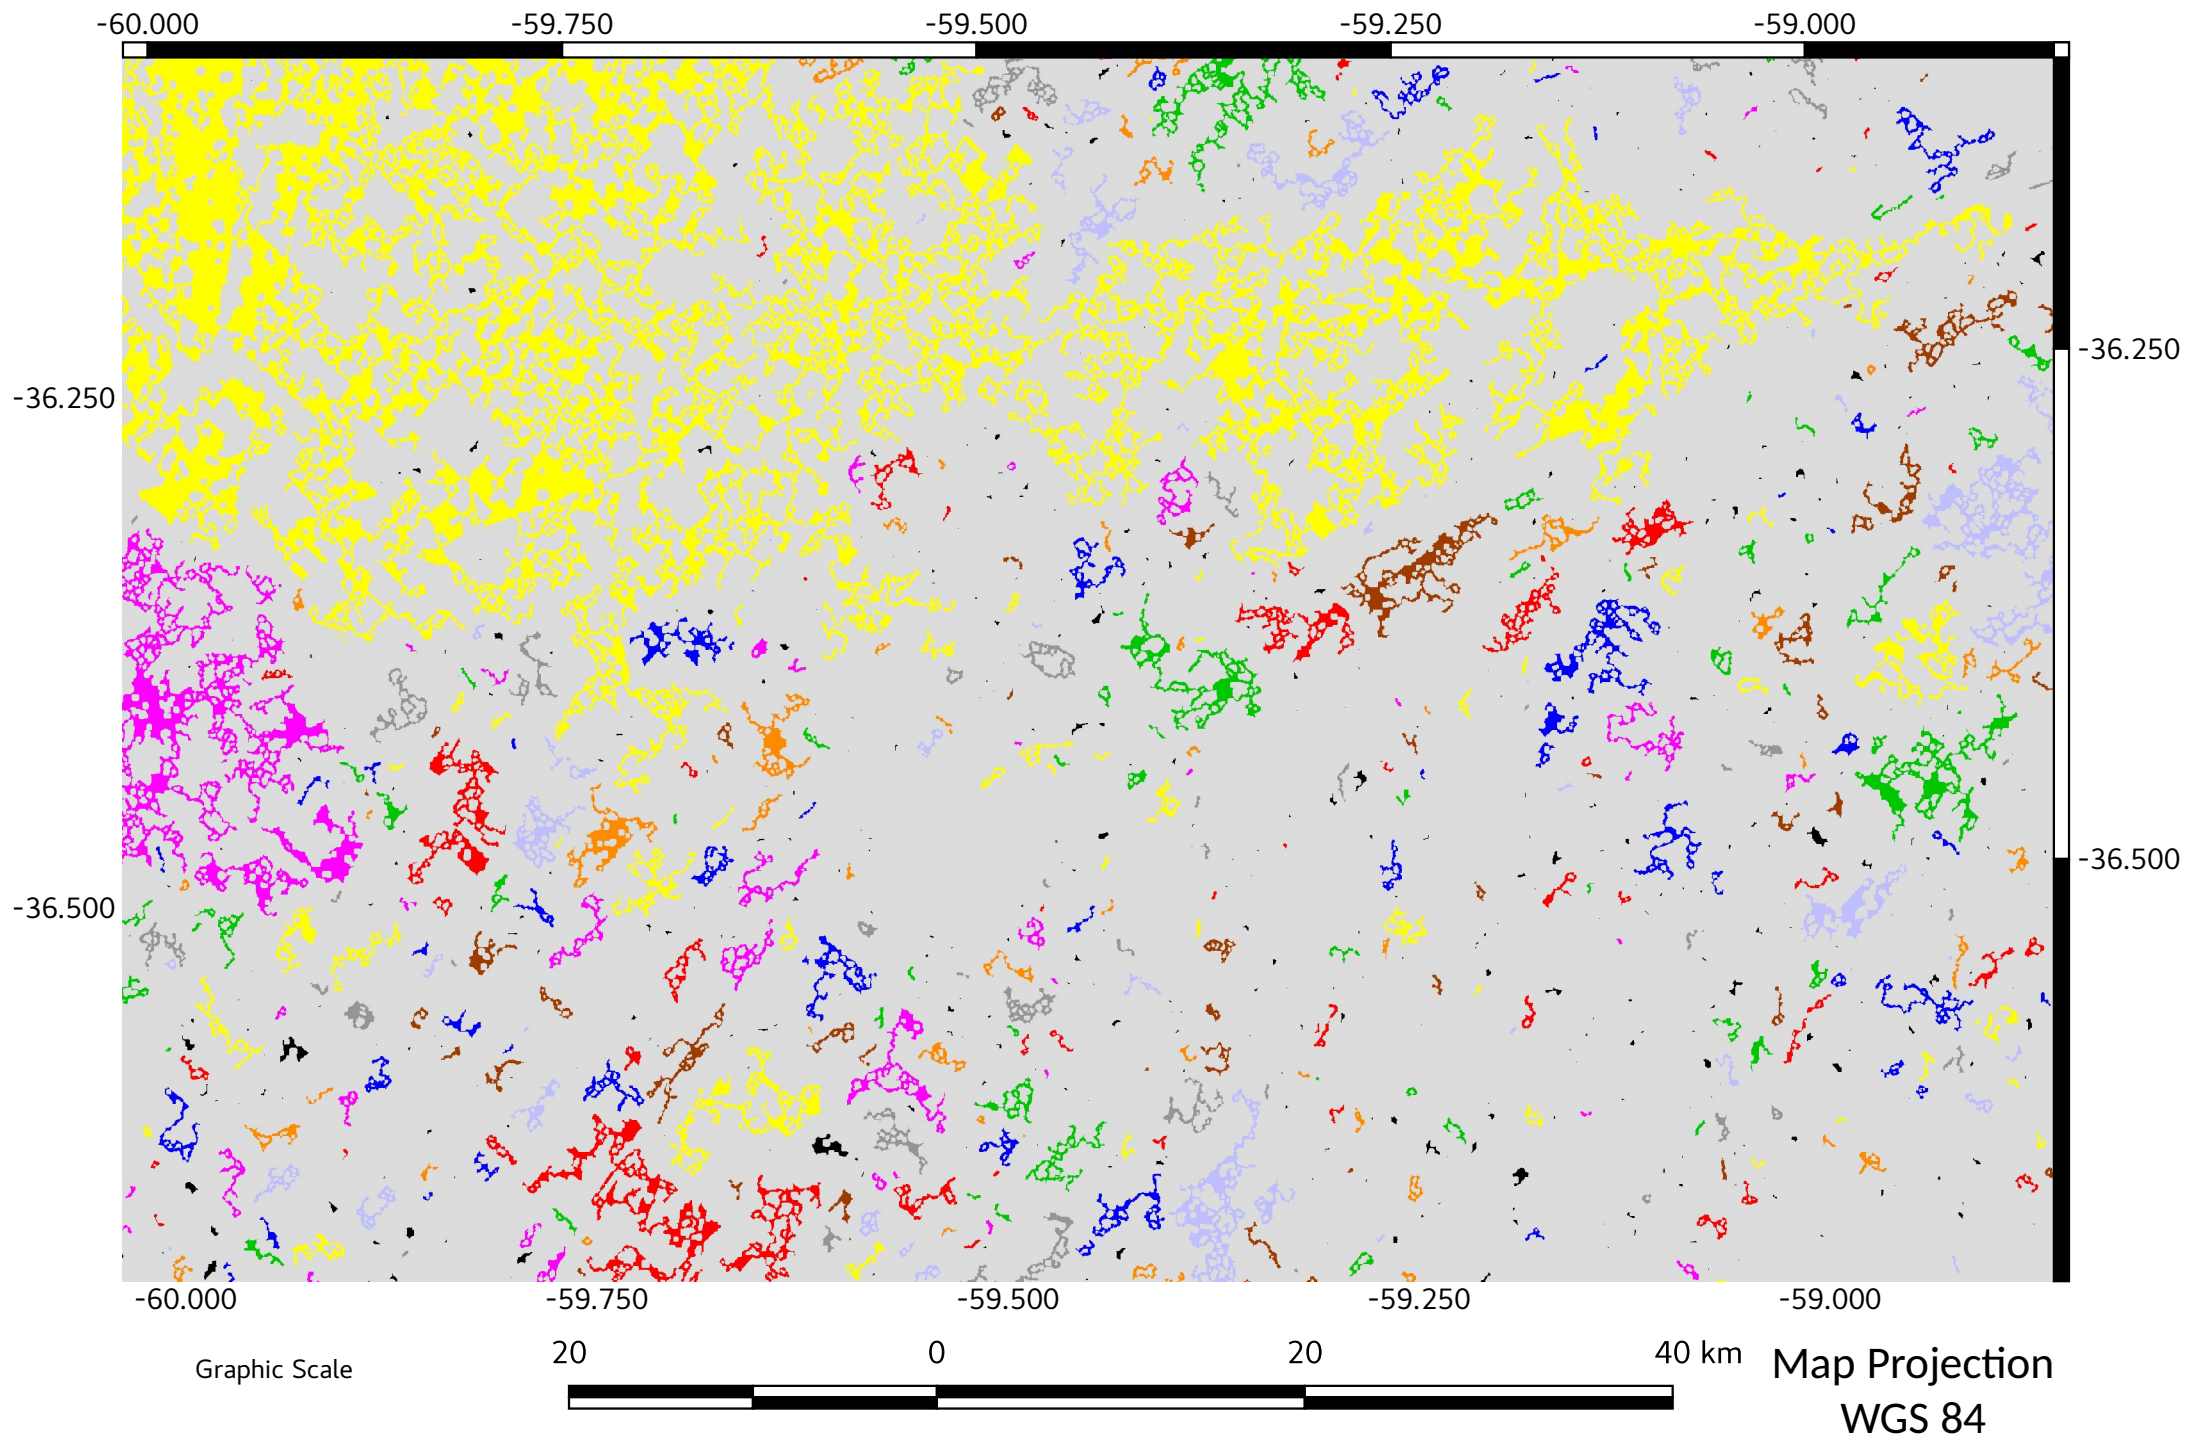

Supplement: extra_results.7z [file extra_results.7z]

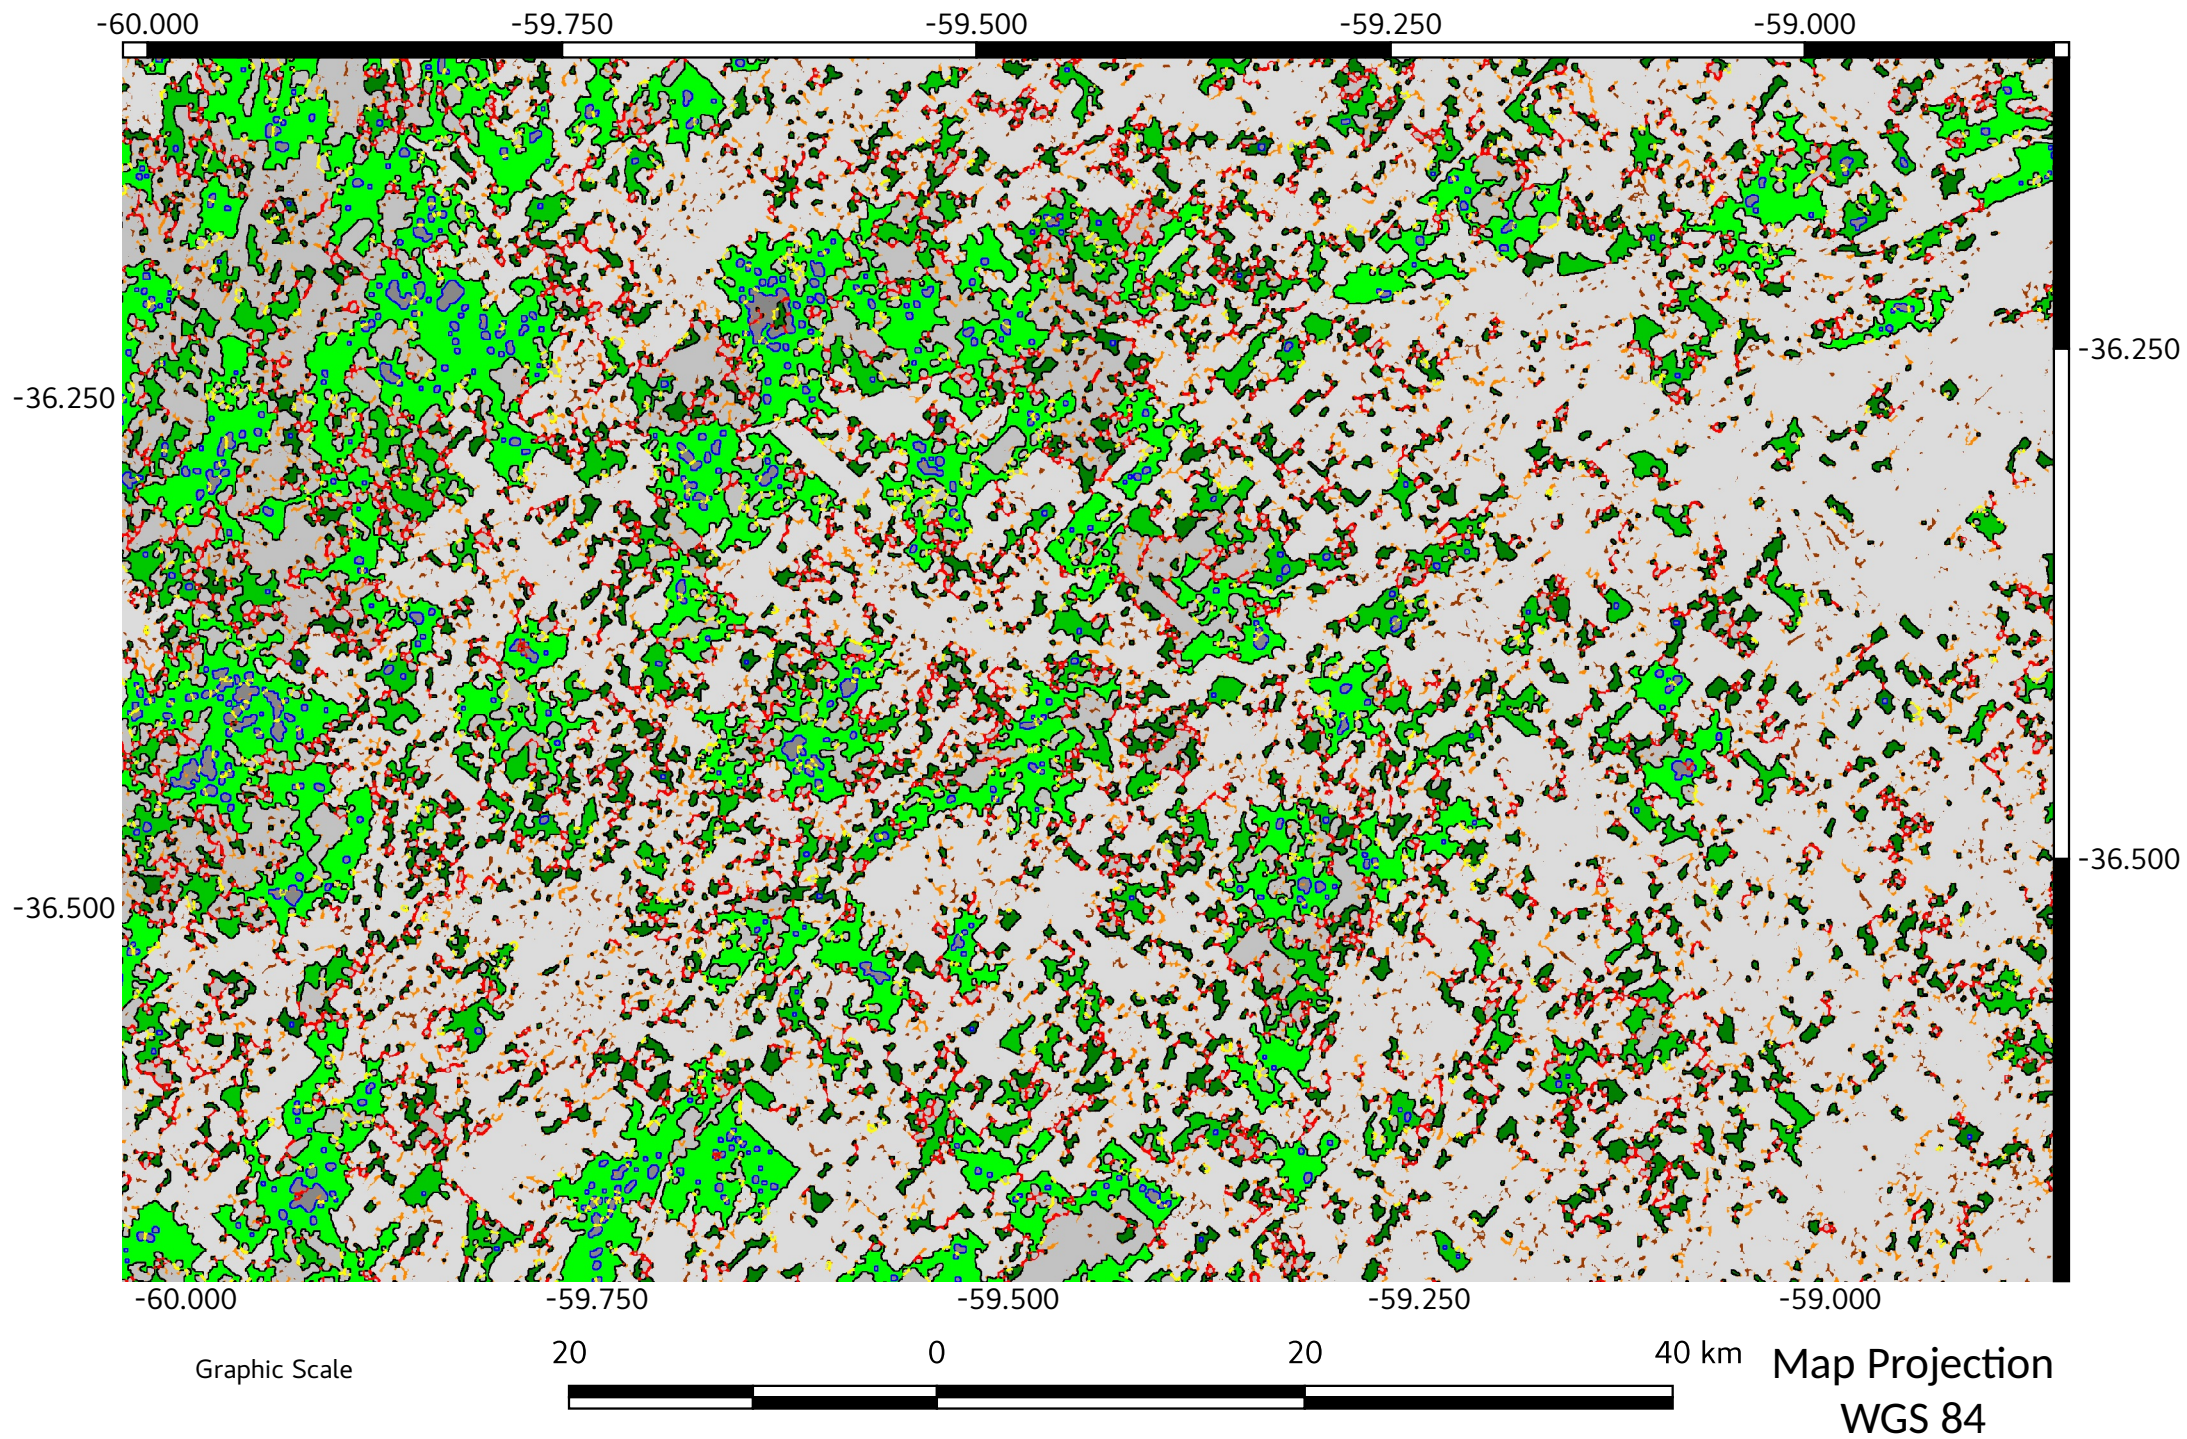

Supplement: extra_results.7z [file extra_results.7z]

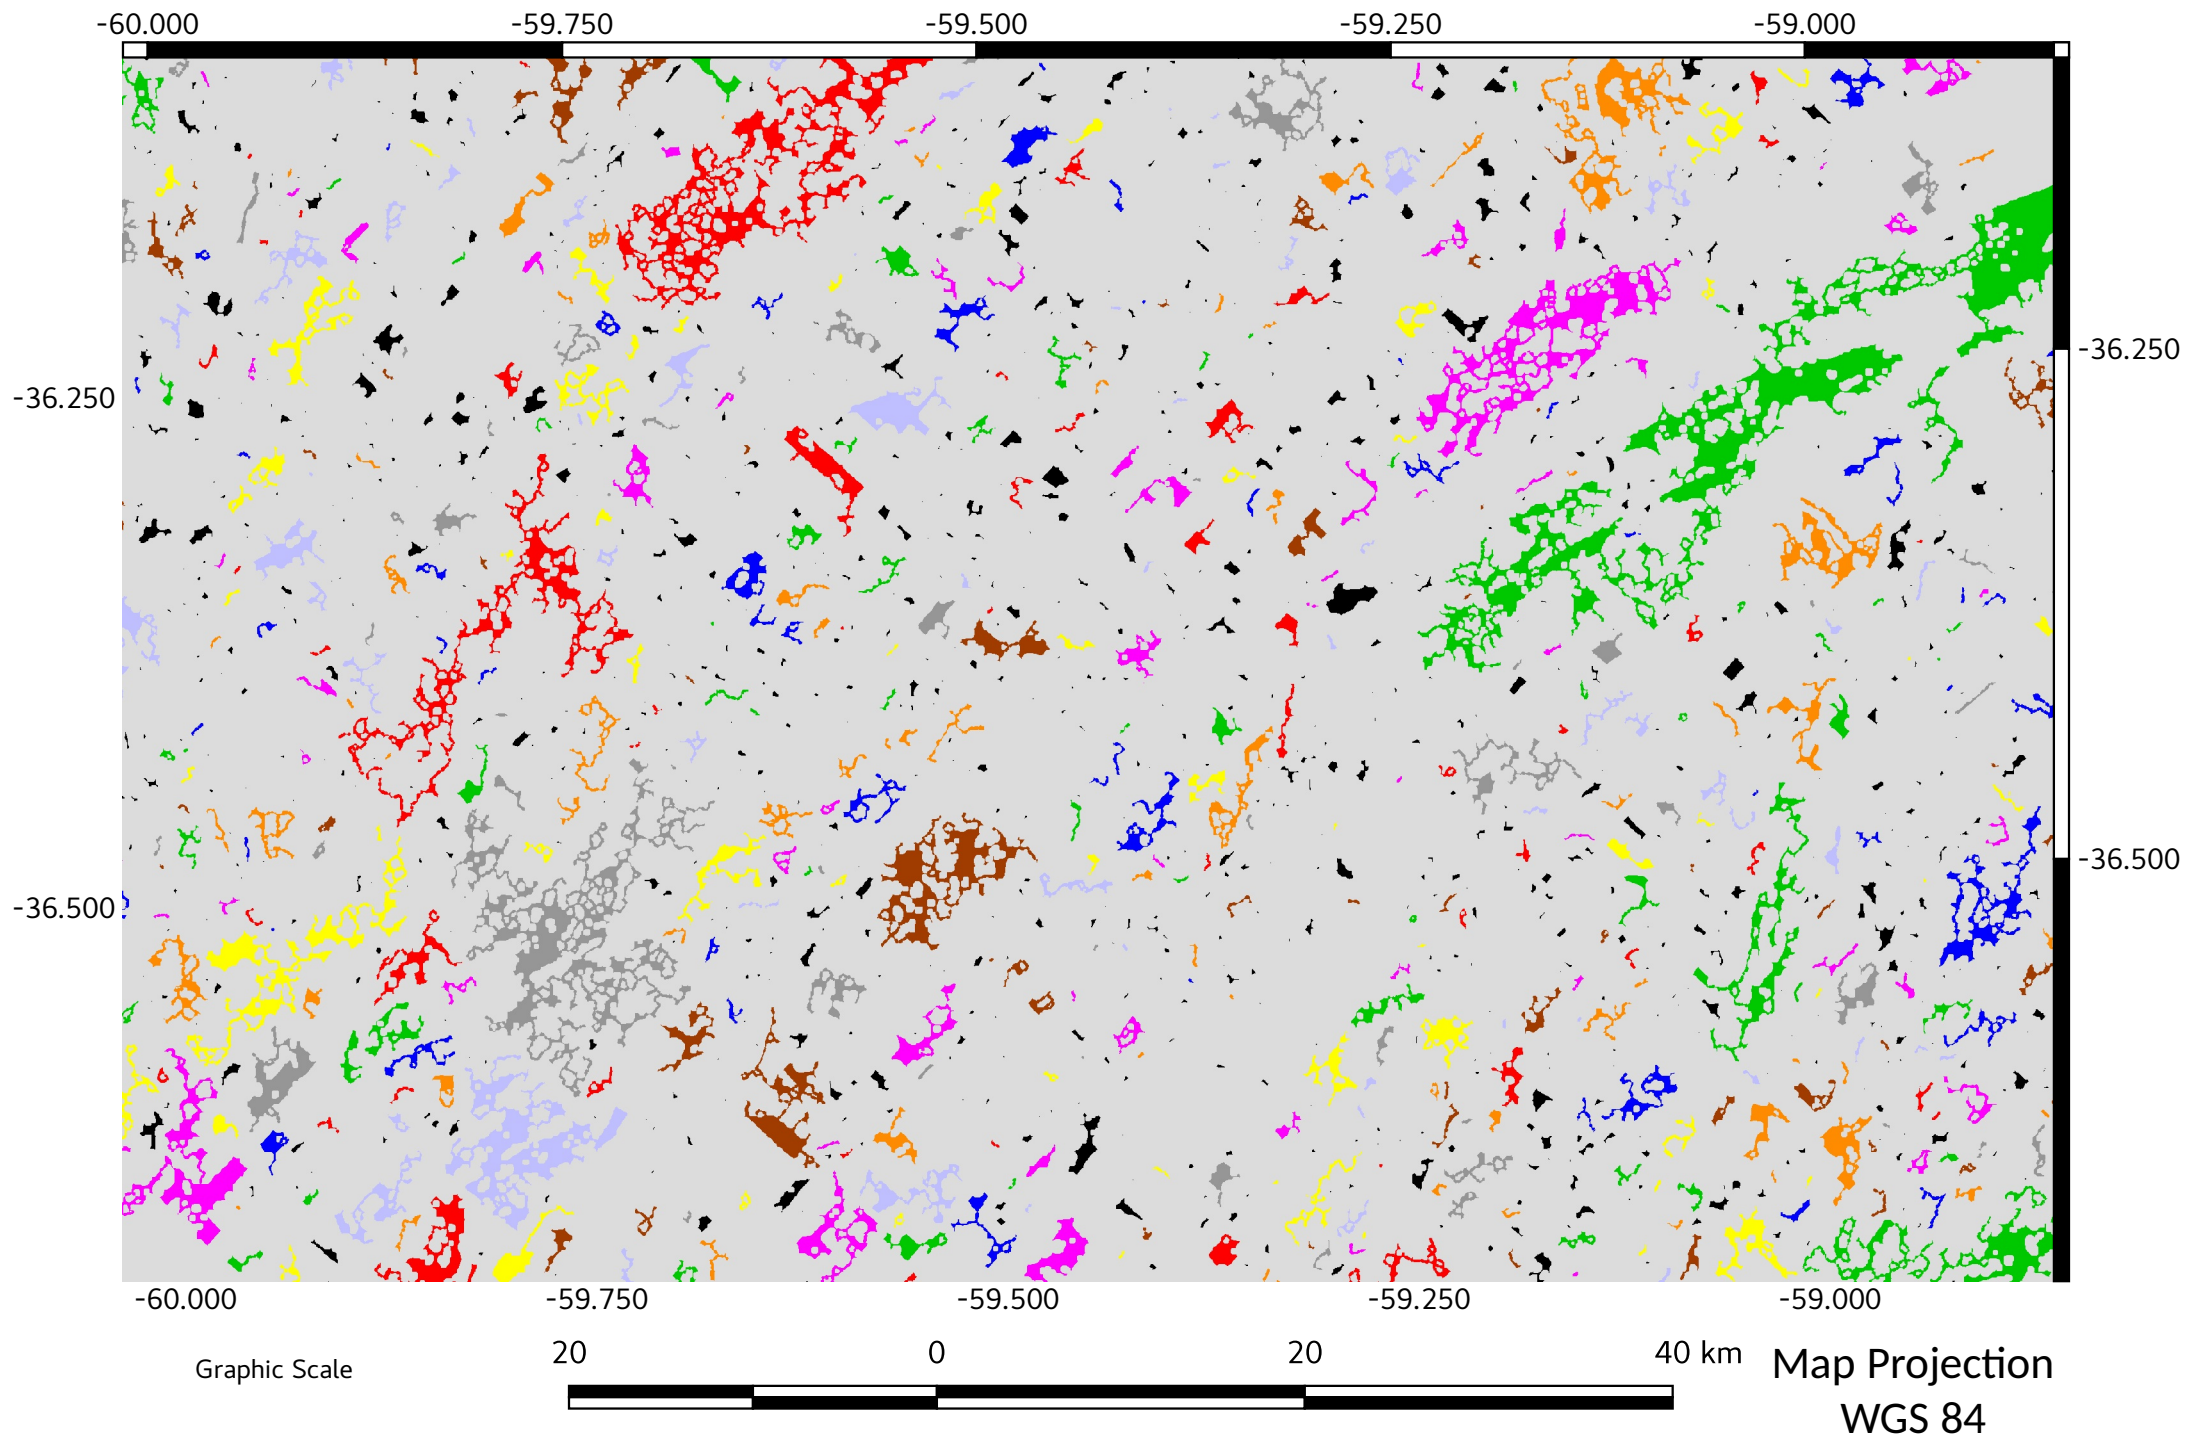

Supplement: extra_results.7z [file extra_results.7z]

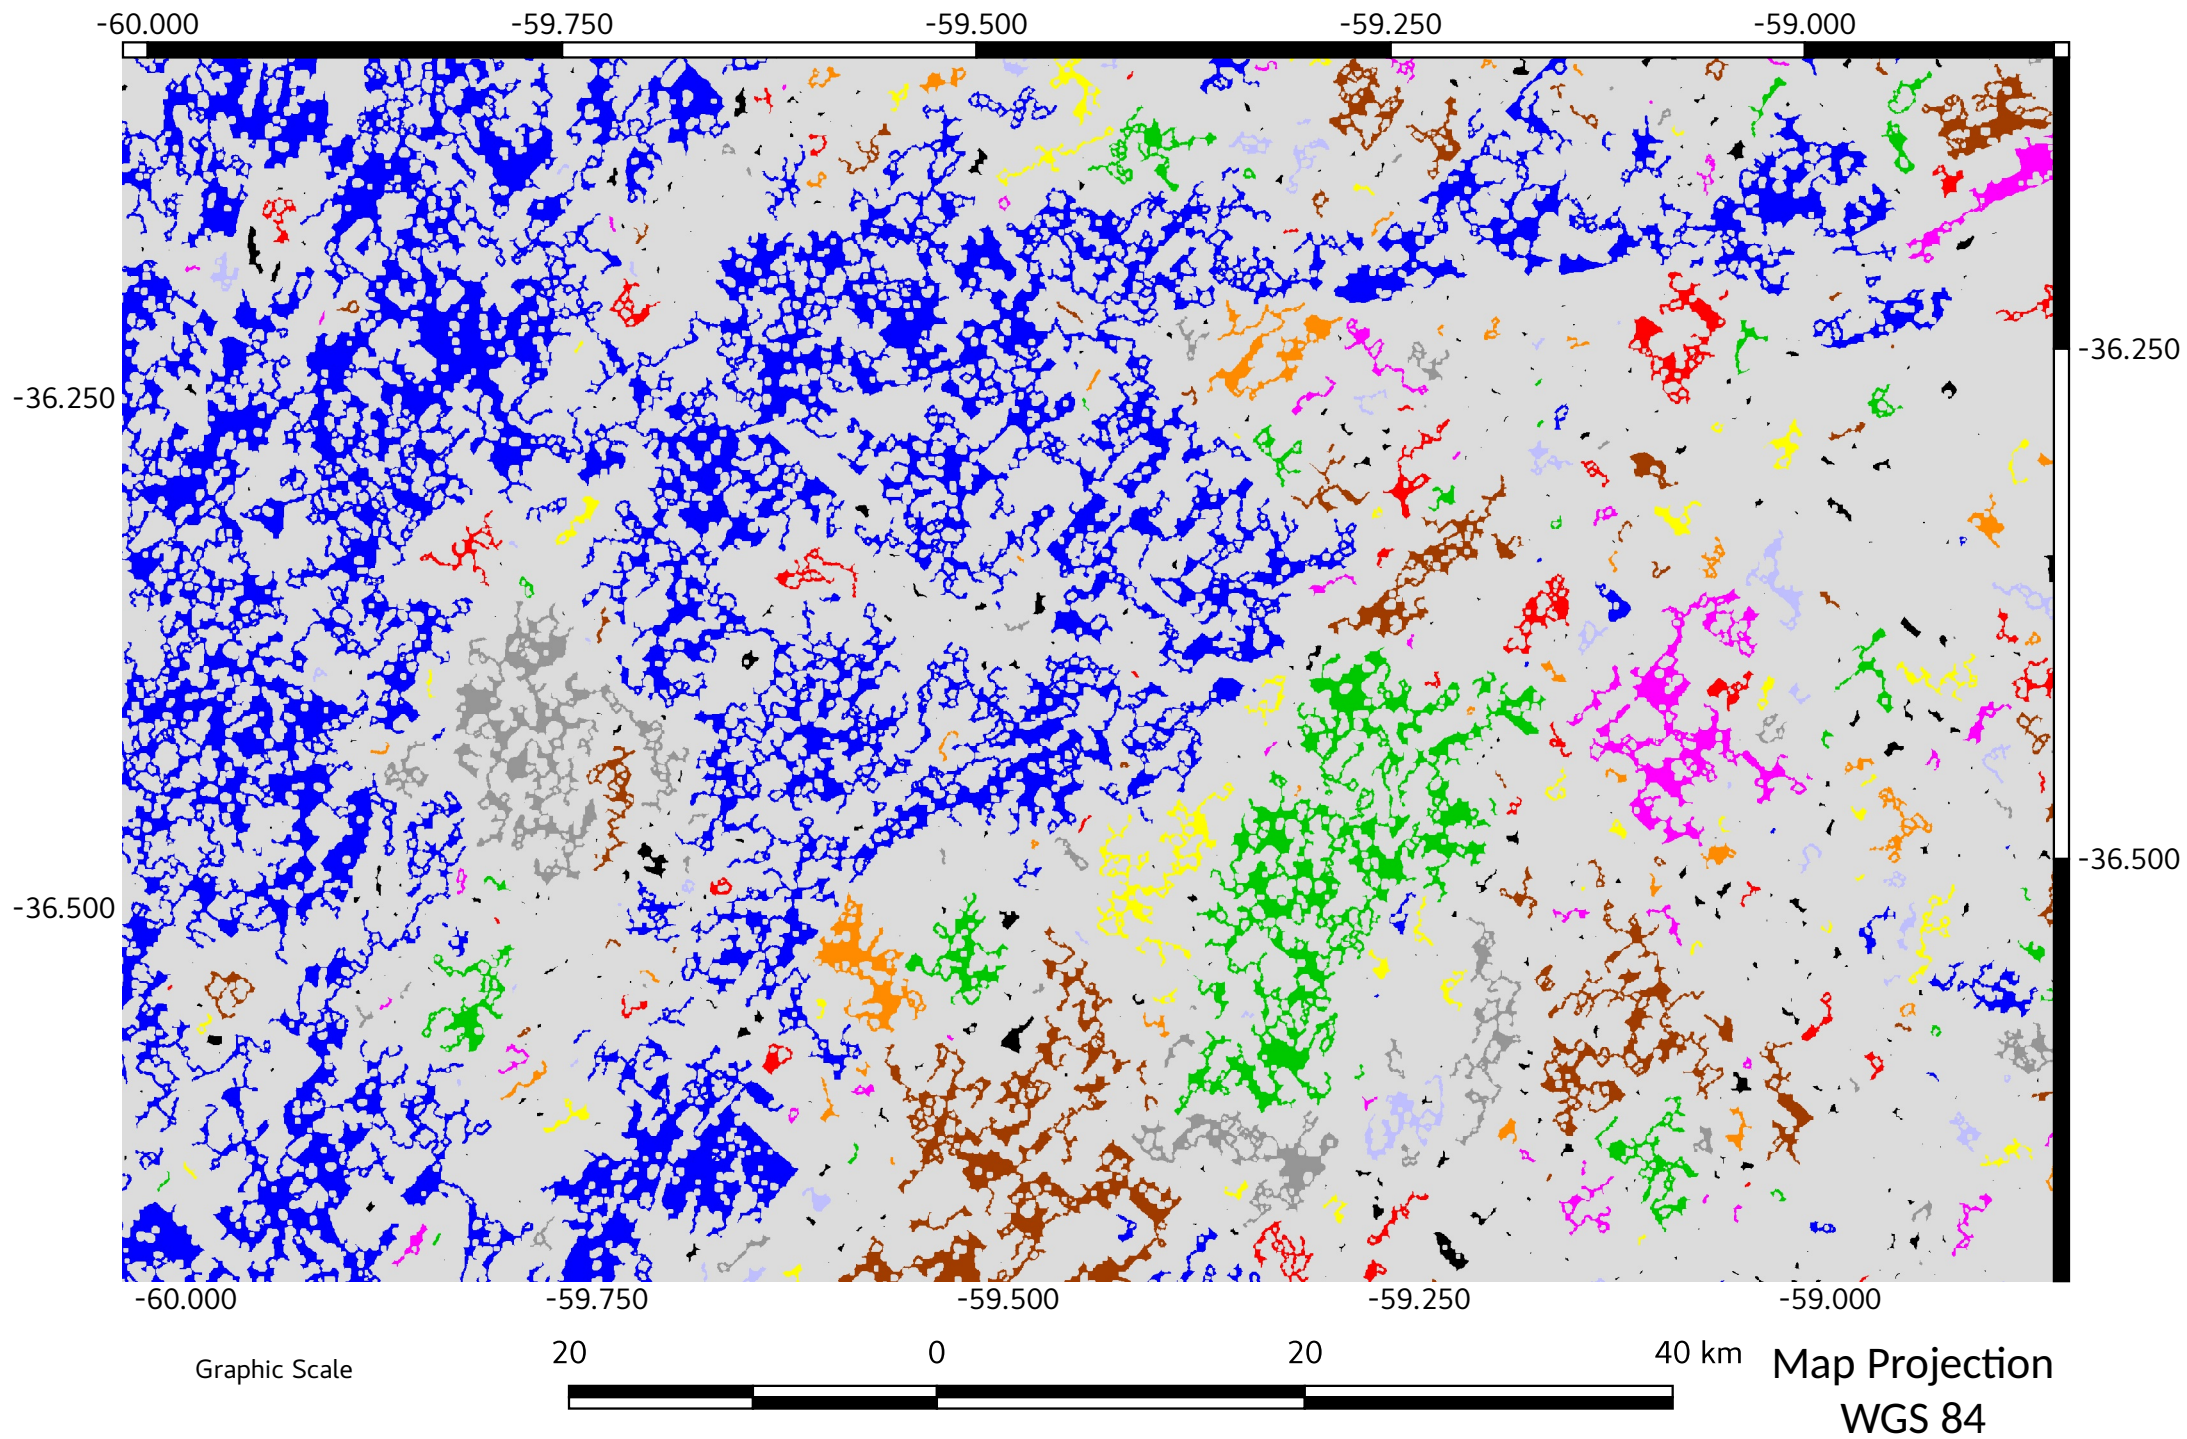

Supplement: extra_results.7z [file extra_results.7z]

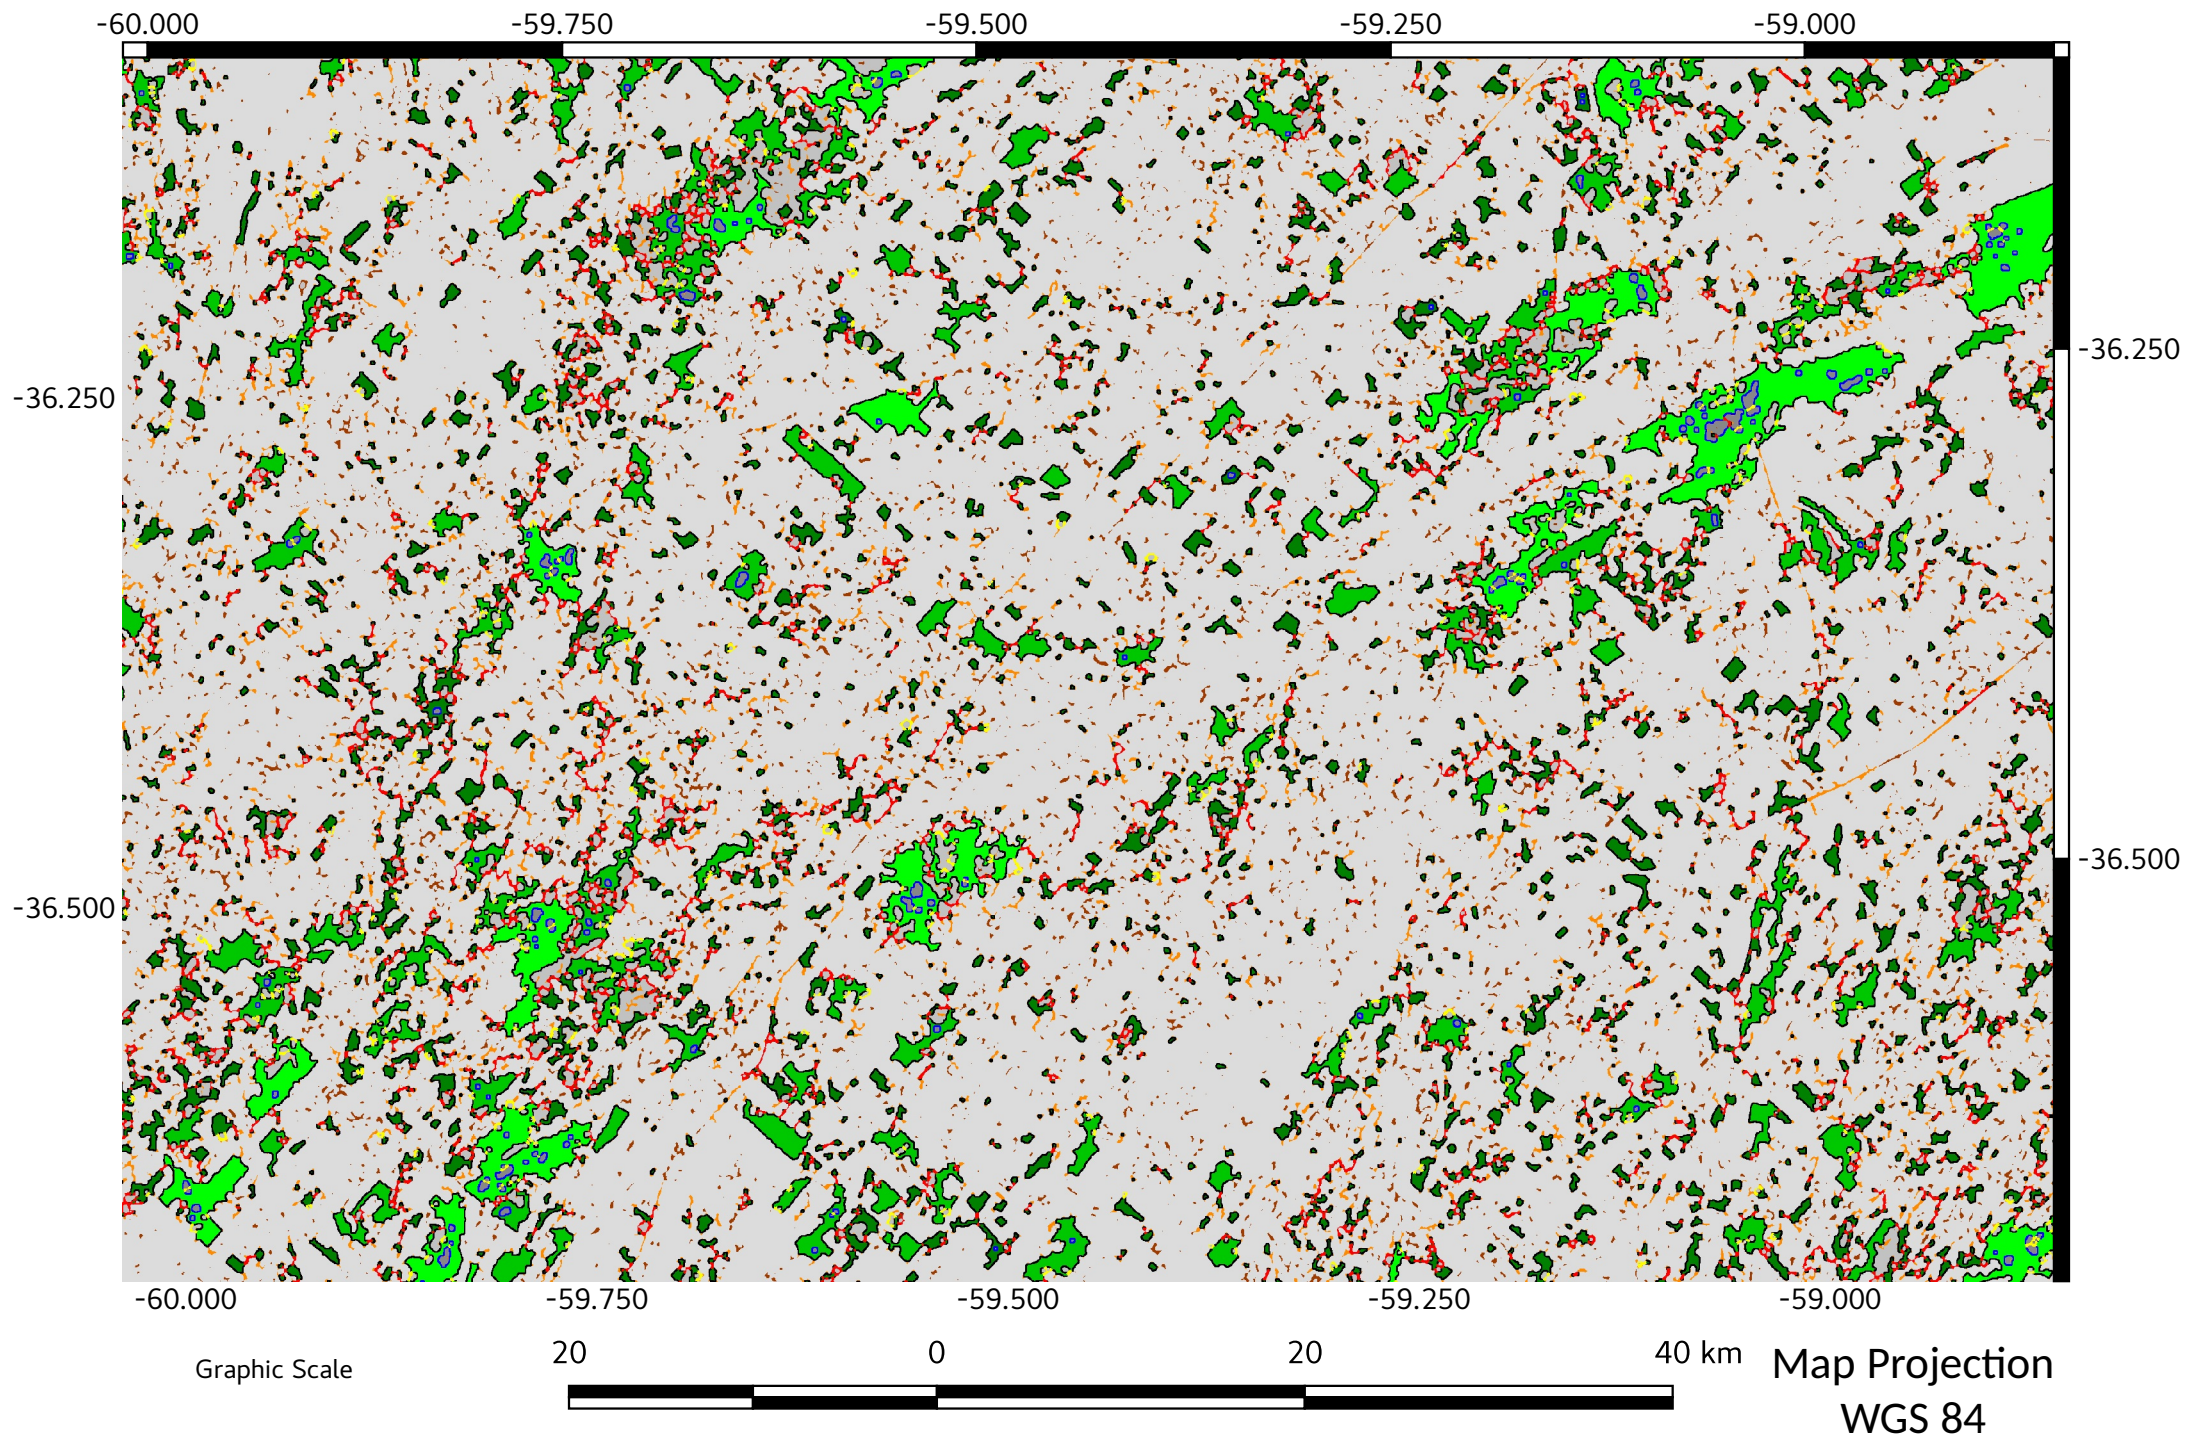

Supplement: extra_results.7z [file extra_results.7z]

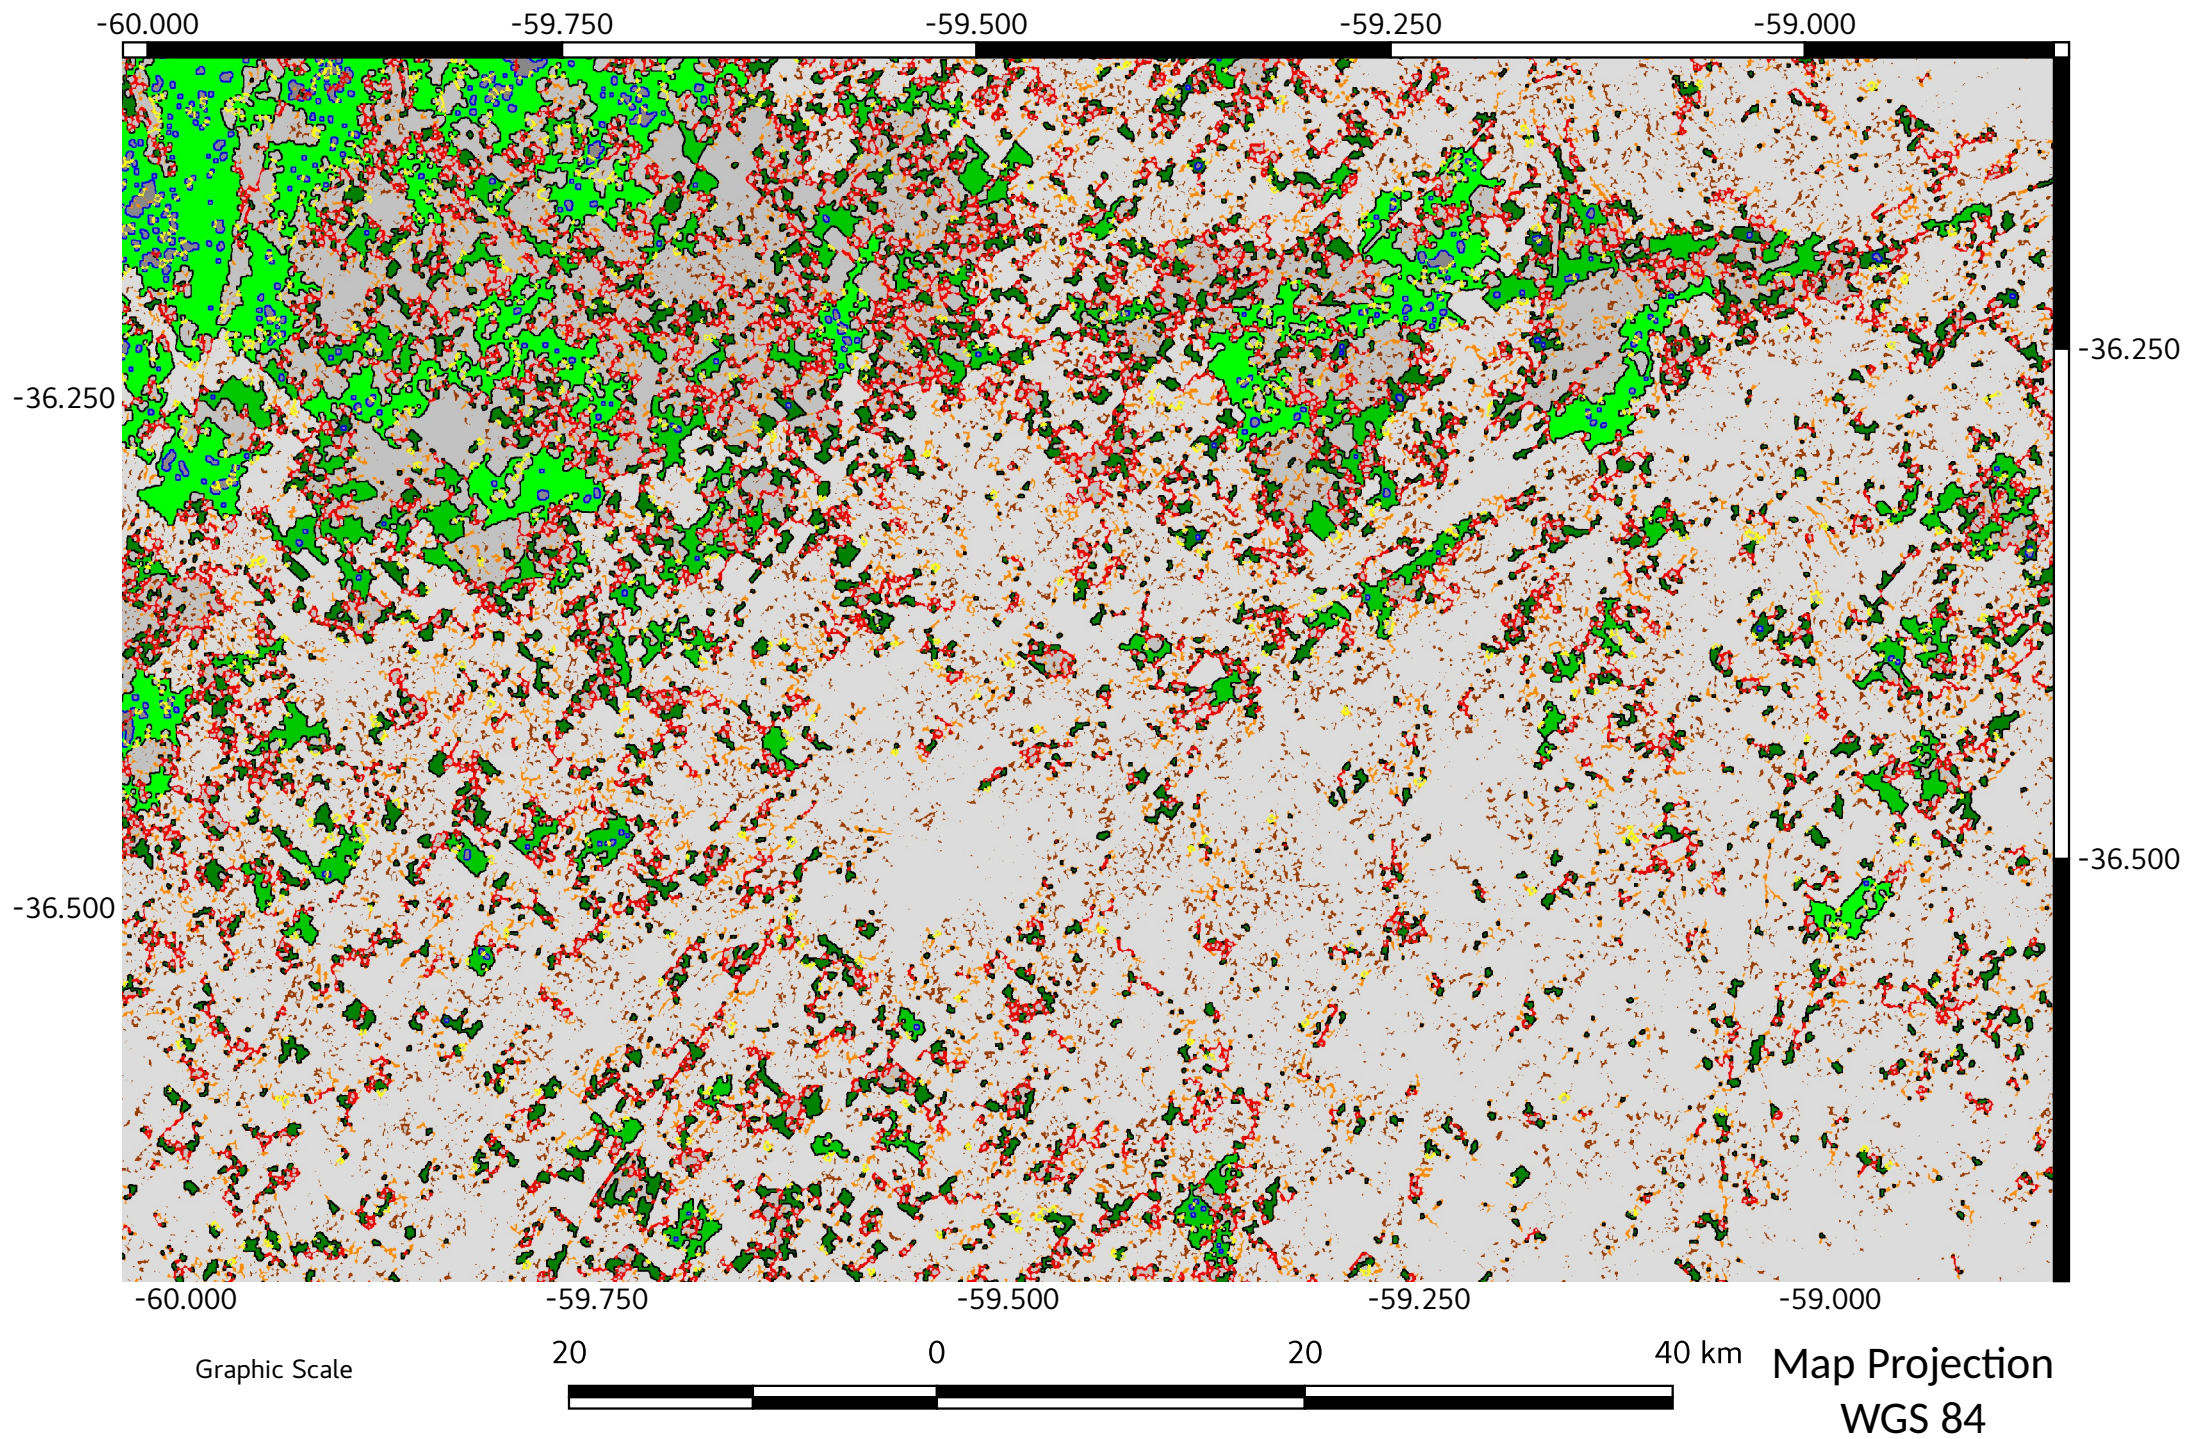

Supplement: extra_results.7z [file extra_results.7z]
